# Supplementary material
Source: Springer Nature journal article supplement (https://www.springermedizin.de/resource/supplementary/12885_2009_1881_MOESM3_ESM.pdf/9461476)

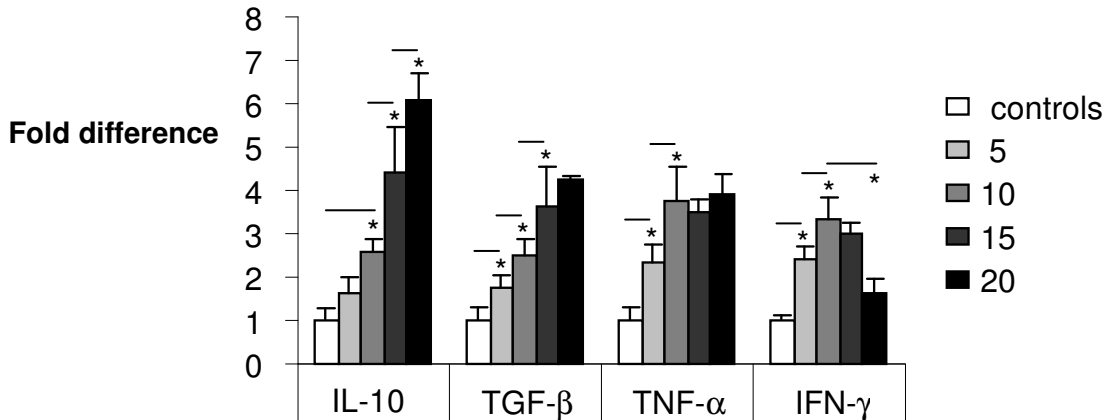

|                       |          |          |          |          |
|-----------------------|----------|----------|----------|----------|
| □ normal liver tissue | 1.0±0.23 | 1.0±0.27 | 1.0±0.29 | 1.0±0.11 |
| ◻ 5                   | 1.6±0.34 | 1.7±0.28 | 2.3±0.40 | 2.4±0.31 |
| ◻ 10                  | 2.5±0.27 | 2.5±0.35 | 3.7±0.76 | 3.3±0.48 |
| ◻ 15                  | 4.4±1.01 | 3.6±0.90 | 3.4±0.29 | 3.0±0.23 |
| ◼ 20                  | 6.1±0.59 | 4.2±0.11 | 3.9±0.43 | 1.6±0.33 |

Supplement: MOESM3 [file 9461476]
